# Supplementary material for: How Modifications of Corneal Cross-Linking Protocols Influence Corneal Resistance to Enzymatic Digestion and Treatment Depth
Source: PubMed Central journal article supplement — Transl Vis Sci Technol. 2023 May 16;12(5):18. doi: 10.1167/tvst.12.5.18 (PMC10198285; doi:10.1167/tvst.12.5.18), 2023-05-16
Supplement: tvst-12-5-18_s001.pdf [file tvst-12-5-18_s001.pdf]

**Supplementary Figure 1: Effects of fluence on corneal surface temperature.**

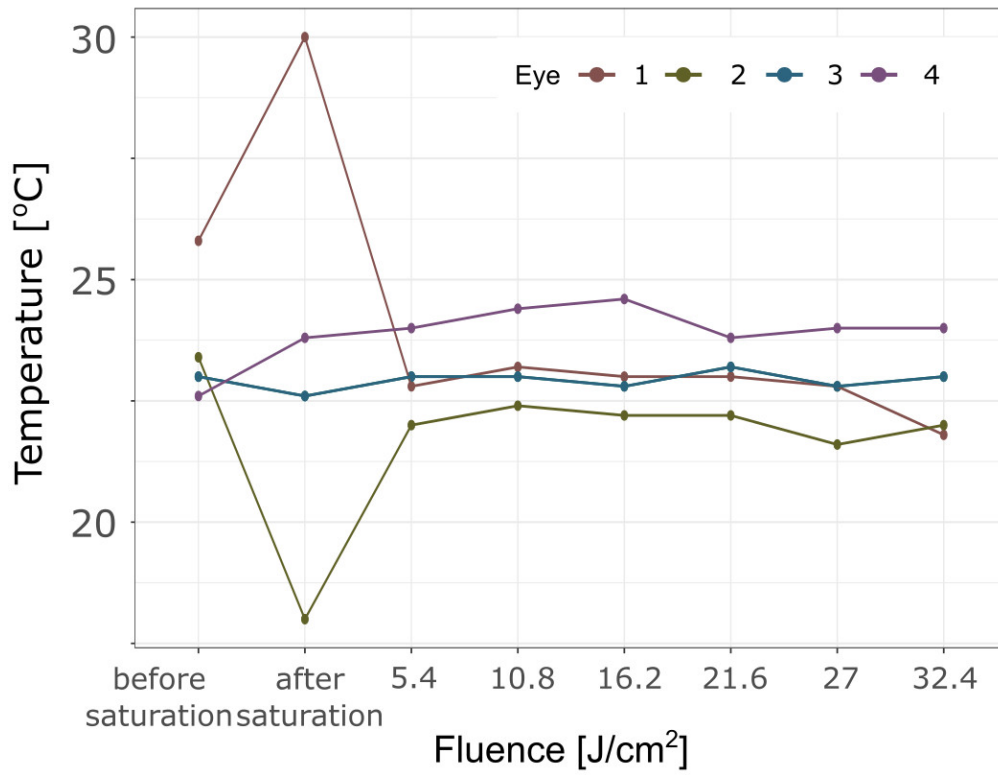

The temperature of the corneal surface was measured eight times: before riboflavin saturation, after saturation and after each irradiation cycle, to check the effects of fluence on the corneal surface temperature.
